# Supplementary material
Source: PubMed Central journal article supplement (PMC524297)
Supplement: nar_32_18_5529__1.pdf [file nar_32_18_5529__1.pdf]

## Supplementary Material S1

A schematic map of the cell cycle is shown which is adapted from KEGG (Kyoto Encyclopedia of Genes and Genomes). The program GenMAPP<sup>11</sup> was used for superimposing the differentially expressed genes. Upregulated genes (+Dox) are represented by red boxes, downregulated (-Dox) by green boxes.
